# Supplementary material for: A No-History Multi-Formula Approach to Improve the IOL Power Calculation after Laser Refractive Surgery: Preliminary Results
Source: MDPI journal article supplement (doi:10.3390/jcm12082890), 2023-04-15
Supplement: s1 [file s1]

## Supplementary Tables

**Supplementary Table S1.** P-values, number of different IOL models involved in the study and A-constant before and after zeroing out the mean error for all examined formulas. (Group A and Group B). Only statistically significant differences were reported.

| Formula              |                                                                                                                                  | Group A                                                                                         |       |         |         |       | Group B |         |         |
|----------------------|----------------------------------------------------------------------------------------------------------------------------------|-------------------------------------------------------------------------------------------------|-------|---------|---------|-------|---------|---------|---------|
| ALMA                 | F: p1<0.001/p2<0.001/p3<0.001<br>J: p1<0.001/p2=0.001/p3<0.001<br>K: p1<0.001/p2=0.004/p3<0.001<br>L: p1<0.001/p2<0.001/p3<0.001 | F: p1<0.001/p2<0.001/p3<0.001<br>J: p1<0.001/p2=0.005/p3<0.001<br>L: p1=0.002/p2=0.049/p3=0.006 |       |         |         |       |         |         |         |
| Barrett              | F: p1<0.001/p2<0.001/p3<0.001<br>J: p1<0.001/p2=0.002/p3<0.001<br>K: p1<0.001/p2=0.009/p3<0.001<br>L: p1<0.001/p2<0.001/p3<0.001 | F: p1<0.001/p2<0.001/p3<0.001<br>J: p1<0.001/p2<0.001/p3<0.001<br>L: p1<0.001/p2=0.005/p3=0.003 |       |         |         |       |         |         |         |
| Shammas              | F: p1<0.001/p2<0.001/p3<0.001<br>J: p1=-/p2=0.002/p3=0.004<br>K: p1=0.001/p2=0.009/p3=0.004<br>L: p1<0.001/p2<0.002/p3<0.001     | F: p1<0.001/p2<0.001/p3<0.001<br>J: p1=0.012/p2=0.005/p3<0.001<br>L: p1=-/p2=0.049/p3=0.016     |       |         |         |       |         |         |         |
| Kim                  | -                                                                                                                                | F: p1=0.004/p2<0.001/p3<0.001<br>J: p1=-/p2=0.009/p3=-                                          |       |         |         |       |         |         |         |
| IOL Model            | N                                                                                                                                | A-Const.                                                                                        | ALMA  | Barrett | Ferrara | Jin   | Kim     | Latkany | Shammas |
| Abbot AAB00 Sensor   | 2                                                                                                                                | 118.4                                                                                           | X     | X       | X       | X     | X       | X       | X       |
| Alcon Acrysof MA60BM | 5                                                                                                                                | 118.9                                                                                           | 118.3 | 120.0   | 116.2   | 120.5 | 120.7   | 122.1   | 119.1   |
| Alcon Restor SA60D3  | 2                                                                                                                                | 118.1                                                                                           | X     | X       | X       | X     | X       | X       | X       |
| Alcon SA60AT         | 3                                                                                                                                | 118.4                                                                                           | 117.2 | 119.1   | 114.9   | 120.0 | 120.3   | 121.8   | 118.7   |
| Alcon SN60WF         | 4                                                                                                                                | 118.7                                                                                           | 118.7 | 120.4   | 116.4   | 120.7 | 121.3   | 122.2   | 119.9   |
| AMO Sensor AR40e     | 14                                                                                                                               | 118.4                                                                                           | 116.8 | 118.0   | 114.0   | 119.5 | 119.3   | 121.3   | 117.8   |
| AMO Tecnis PCB00     | 15                                                                                                                               | 118.8                                                                                           | 116.5 | 118.6   | 112.5   | 120.6 | 120.1   | 122.3   | 118.7   |
| AMO Tecnis ZMA00     | 2                                                                                                                                | 119.1                                                                                           | X     | X       | X       | X     | X       | X       | X       |
| AMO Tecnis Z9000     | 16                                                                                                                               | 119.0                                                                                           | 118.7 | 120.0   | 116.3   | 121.0 | 120.9   | 122.9   | 119.6   |
| B&L Akreos Adapt     | 11                                                                                                                               | 118.0                                                                                           | 118.8 | 120.3   | 116.8   | 120.6 | 121.2   | 122.6   | 119.7   |
| B&L Akreos AOMI60    | 2                                                                                                                                | 118.4                                                                                           | X     | X       | X       | X     | X       | X       | X       |
| B&L C31UB            | 1                                                                                                                                | 119.0                                                                                           | X     | X       | X       | X     | X       | X       | X       |
| Corneal ACR600SE     | 2                                                                                                                                | 120.0                                                                                           | X     | X       | X       | X     | X       | X       | X       |
| Corneal PHACNS5      | 1                                                                                                                                | 118.5                                                                                           | X     | X       | X       | X     | X       | X       | X       |
| Corneal Quatrix      | 1                                                                                                                                | 119.6                                                                                           | X     | X       | X       | X     | X       | X       | X       |
| Curamed SA60CZ       | 3                                                                                                                                | 118.8                                                                                           | 116.4 | 119.9   | 107.1   | 122.1 | 121.2   | 124.4   | 119.5   |
| Hexavision HQ203HEP  | 2                                                                                                                                | 118.2                                                                                           | X     | X       | X       | X     | X       | X       | X       |
| Hoya AF1FY60AD       | 3                                                                                                                                | 118.4                                                                                           | 118.0 | 119.7   | 115.3   | 120.7 | 121.1   | 122.0   | 119.7   |
| Hoya iSert 250       | 5                                                                                                                                | 118.4                                                                                           | 116.9 | 118.5   | 114.3   | 120.3 | 119.9   | 121.8   | 118.2   |
| Hoya VA6BB           | 6                                                                                                                                | 118.7                                                                                           | 116.3 | 117.8   | 112.4   | 121.1 | 119.4   | 122.7   | 118.1   |
| Soleko Fil611        | 1                                                                                                                                | 119.0                                                                                           | X     | X       | X       | X     | X       | X       | X       |
| Tech Med ISP60Z      | 5                                                                                                                                | 118.2                                                                                           | 116.5 | 117.5   | 112.8   | 118.5 | 119.5   | 119.7   | 117.9   |
| Zeiss CT Spheris 203 | 1                                                                                                                                | 118.0                                                                                           | X     | X       | X       | X     | X       | X       | X       |

Formula: best method compared to the formulas shown in the adjacent columns; F: Ferrara Formula, K: Kim Formula, J: Jin Formula, L: Latkany Formula; p1: level of significance regarding median absolute errors between formulas according to the Friedman test with Bonferroni correction; p2/p3: level of significance regarding the percentages of eyes with a refractive Prediction Error within 0.50D and within 1.00D between formulas, according to Cochran Q Test; - = p value > 0.05; N: Number of IOL analyzed for each model; X: optimized constant not available.

**Supplementary Table S2:** Comparison of Refractive Outcome among examined formulas: additional parameters (Group A and B)

| G                    | Formula    | ALMA            | Barrett         | Ferrara         | Jin             | Kim             | Latkany         | Shammas         |
|----------------------|------------|-----------------|-----------------|-----------------|-----------------|-----------------|-----------------|-----------------|
| K ≤ 36.0D            |            |                 |                 |                 |                 |                 |                 |                 |
| A                    | MAE/STD    | 1.37D/0.19D     | 0.91D/0.14D     | 3.85D/0.37D     | 2.12D/0.22D     | 1.10D/0.16D     | 3.22D/0.24D     | 1.03D/0.12D     |
|                      | Min/Max    | 0.07/3.52D      | 0.03/2.98D      | 0.01/8.22D      | 0.22/3.76D      | 0.04/2.53D      | 0.49/5.37D      | 0.05/3.15D      |
|                      | IQR/CI 95% | 1.38/1.00-1.74D | 1.12/0.64-1.18D | 2.92/3.13-4.59D | 2.27/1.68-2.56D | 1.64/0.83-1.47D | 2.16/2.74-3.68D | 0.95/0.79-1.27D |
| B                    | MAE/STD    | 0.78D/0.14D     | 0.67D/0.11D     | 2.05D/0.25D     | 1.24D/0.18D     | 0.80D/0.13D     | 1.12D/0.17D     | 0.81D/0.12D     |
|                      | Min/Max    | 0.00/2.47D      | 0.07/2.16D      | 0.30/4.38D      | 0.11/2.72D      | 0.10/2.66D      | 0.03/2.64D      | 0.03/2.65D      |
|                      | IQR/CI 95% | 0.79/0.50-1.06D | 0.88/0.45-0.89D | 2.11/1.55-2.55D | 1.57/0.90-1.58D | 0.87/0.56-1.04D | 1.48/0.80-1.46D | 0.72/0.57-1.05D |
| 36.0D < K ≤ 38.0D    |            |                 |                 |                 |                 |                 |                 |                 |
| A                    | MAE/STD    | 0.96D/0.11D     | 0.86D/0.11D     | 2.47D/0.29D     | 1.55D/0.18D     | 1.34D/0.16D     | 2.54D/0.23D     | 0.91D/0.13D     |
|                      | Min/Max    | 0.02/2.47D      | 0.01/3.12D      | 0.00/7.22D      | 0.02/4.55D      | 0.01/4.37D      | 0.02/6.06D      | 0.09/3.24D      |
|                      | IQR/CI 95% | 0.97/0.74-1.18D | 0.73/0.65-1.08D | 2.41/1.90-3.04D | 1.49/1.19-1.91D | 1.06/1.03-1.65D | 1.57/2.10-2.98D | 0.97/0.66-1.16D |
| B                    | MAE/STD    | 0.74D/0.11D     | 0.66D/0.09D     | 1.56D/0.28D     | 1.00D/0.14D     | 0.78D/0.12D     | 0.93D/0.14D     | 0.78D/0.11D     |
|                      | Min/Max    | 0.08/2.16D      | 0.08/1.43D      | 0.03/5.08D      | 0.03/2.42D      | 0.00/1.76D      | 0.01/2.51D      | 0.14/1.75D      |
|                      | IQR/CI 95% | 0.71/0.52-0.96D | 0.85/0.48-0.84D | 1.73/1.02-2.10D | 1.01/0.73-1.27D | 1.11/0.54-1.02D | 0.84/0.65-1.21D | 0.88/0.56-1.00D |
| 38.0D < K ≤ 40.0D    |            |                 |                 |                 |                 |                 |                 |                 |
| A                    | MAE/STD    | 0.92D/0.11D     | 1.06D/0.12D     | 1.95D/0.20D     | 1.37D/0.15D     | 1.54D/0.17D     | 2.22D/0.19D     | 1.09D/0.12D     |
|                      | Min/Max    | 0.01/2.79D      | 0.05/2.74D      | 0.27/6.08D      | 0.01/3.10D      | 0.03/3.50D      | 0.11/4.43D      | 0.04/2.43D      |
|                      | IQR/CI 95% | 1.08/0.71-1.13D | 1.19/0.83-1.29D | 1.80/1.56-2.34D | 1.42/1.01-1.59D | 1.80/1.21-1.87D | 1.90/1.85-2.59D | 1.38/0.86-1.32D |
| B                    | MAE/STD    | 0.66D/0.12D     | 0.83D/0.12D     | 1.19D/0.19D     | 1.27D/0.15D     | 1.00D/0.14D     | 1.14D/0.15D     | 0.95D/0.14D     |
|                      | Min/Max    | 0.01/2.07D      | 0.02/2.34D      | 0.18/4.03D      | 0.16/2.81D      | 0.10/2.83D      | 0.17/2.91D      | 0.03/2.62D      |
|                      | IQR/CI 95% | 0.95/0.43-0.89D | 1.04/0.59-1.07D | 1.21/0.81-1.57D | 1.35/0.98-1.56D | 1.01/0.72-1.28D | 1.20/0.85-1.43D | 1.11/0.68-1.22D |
| K > 40.0D            |            |                 |                 |                 |                 |                 |                 |                 |
| A                    | MAE/STD    | 0.79D/0.17D     | 0.95D/0.20D     | 1.60D/0.21D     | 1.19D/0.18D     | 1.75D/0.24D     | 1.80D/0.27D     | 1.03D/0.20D     |
|                      | Min/Max    | 0.02/4.43D      | 0.00/4.89D      | 0.28/5.42D      | 0.05/4.75D      | 0.25/6.36D      | 0.02/6.62D      | 0.01/4.87D      |
|                      | IQR/CI 95% | 0.81/0.46-1.12D | 1.26/0.56-1.34D | 1.52/1.20-2.00D | 0.82/0.83-1.55D | 1.44/1.28-2.22D | 1.74/1.27-2.33D | 1.22/0.63-1.43D |
| B                    | MAE/STD    | 0.77D/0.12D     | 0.43D/0.09D     | 1.98D/0.39D     | 1.02D/0.20D     | 0.53D/0.12D     | 0.95D/0.19D     | 0.46D/0.11D     |
|                      | Min/Max    | 0.01/1.37D      | 0.02/1.47D      | 0.07/4.28D      | 0.02/2.33D      | 0.02/1.56D      | 0.01/2.42D      | 0.04/1.56D      |
|                      | IQR/CI 95% | 0.89/0.54-1.00D | 0.49/0.25-0.62D | 3.38/1.23-2.73D | 1.61/0.64-1.41D | 0.66/0.29-0.77D | 1.32/0.58-1.32D | 0.62/0.24-0.68D |
| AL ≤ 26.5mm          |            |                 |                 |                 |                 |                 |                 |                 |
| A                    | MAE/STD    | 0.83D/0.12D     | 0.86D/0.13D     | 1.21D/0.11D     | 1.01D/0.13D     | 1.20D/0.16D     | 1.59D/0.19D     | 0.98D/0.14D     |
|                      | Min/Max    | 0.02/4.43D      | 0.01/4.89D      | 0.00/3.22D      | 0.01/4.75D      | 0.01/6.36D      | 0.02/6.62D      | 0.03/4.87D      |
|                      | IQR/CI 95% | 0.91/0.60-1.06D | 0.87/0.61-1.11D | 0.96/1.00-1.42D | 0.70/0.76-1.26D | 1.00/0.89-1.51D | 1.45/1.22-1.96D | 1.14/0.70-1.26D |
| B                    | MAE/STD    | 0.82D/0.10D     | 0.61D/0.12D     | 1.98D/0.30D     | 1.53D/0.15D     | 0.74D/0.16D     | 1.36D/0.16D     | 0.76D/0.16D     |
|                      | Min/Max    | 0.02/1.85D      | 0.02/1.77D      | 0.07/4.28D      | 0.30/2.81D      | 0.02/2.66D      | 0.15/2.91D      | 0.03/2.65D      |
|                      | IQR/CI 95% | 0.88/0.62-1.02D | 1.03/0.38-0.83D | 2.90/1.39-2.57D | 1.08/1.24-1.82D | 1.27/0.43-1.05D | 1.26/1.06-1.67D | 1.13/0.45-1.07D |
| 26.50 < AL ≤ 28.00mm |            |                 |                 |                 |                 |                 |                 |                 |
| A                    | MAE/STD    | 1.04D/0.15D     | 1.03D/0.15D     | 1.90D/0.16D     | 1.20D/0.16D     | 1.58D/0.19D     | 2.38D/0.21D     | 1.05D/0.13D     |
|                      | Min/Max    | 0.01/3.17D      | 0.00/3.40D      | 0.028/3.64D     | 0.02/3.64D      | 0.07/4.81D      | 0.02/4.27D      | 0.01/3.54D      |
|                      | IQR/CI 95% | 1.02/0.74-1.34D | 1.24/0.73-1.32D | 1.59/1.59-2.22D | 1.39/0.88-1.52D | 1.76/1.20-1.57D | 1.65/1.20-1.96D | 1.12/0.79-1.31D |
| B                    | MAE/STD    | 0.76D/0.15D     | 0.68D/0.09D     | 1.15D/0.21D     | 0.75D/0.13D     | 0.76D/0.10D     | 0.72D/0.14D     | 0.75D/0.10D     |
|                      | Min/Max    | 0.01/2.47D      | 0.14/1.39D      | 0.18/3.68D      | 0.02/2.14D      | 0.11/1.61D      | 0.01/2.47D      | 0.03/1.71D      |
|                      | IQR/CI 95% | 1.00/0.47-1.05D | 0.65/0.51-0.85D | 0.90/0.74-1.56D | 1.04/0.50-1.00D | 0.84/0.56-0.96D | 0.95/0.45-0.99D | 0.77/0.55-0.95D |
| 28.00 < AL ≤ 29.50mm |            |                 |                 |                 |                 |                 |                 |                 |
| A                    | MAE/STD    | 0.98D/0.12D     | 1.11D/0.15D     | 2.77D/0.23D     | 1.94D/0.19D     | 1.85D/0.21D     | 3.08D/0.22D     | 1.10D/0.15D     |
|                      | Min/Max    | 0.02/2.39D      | 0.06/3.12D      | 0.40/5.42D      | 0.01/4.55D      | 0.04/4.37D      | 1.31/6.06D      | 0.05/3.24D      |
|                      | IQR/CI 95% | 0.84/0.74-1.22D | 1.20/0.81-1.41D | 1.70/2.32-3.22D | 1.54/1.57-2.31D | 1.46/1.44-2.26D | 1.52/2.65-3.51D | 1.08/0.80-1.40D |
| B                    | MAE/STD    | 0.65D/0.11D     | 0.72D/0.13D     | 1.11D/0.15D     | 0.87D/0.14D     | 0.87D/0.15D     | 0.86D/0.15D     | 0.79D/0.14D     |
|                      | Min/Max    | 0.01/2.07D      | 0.02/2.34D      | 0.08/2.81D      | 0.03/2.06D      | 0.10/2.83D      | 0.01/2.63D      | 0.17/2.62D      |
|                      | IQR/CI 95% | 0.88/0.43-0.87D | 0.84/0.47-0.97D | 0.63/0.82-1.42D | 0.91/0.60-1.36D | 0.85/0.58-1.16D | 0.94/0.57-1.15D | 0.94/0.52-1.06D |
| AL > 29.50mm         |            |                 |                 |                 |                 |                 |                 |                 |
| A                    | MAE/STD    | 1.29D/0.20D     | 0.85D/0.12D     | 4.94D/0.31D     | 2.35D/0.22D     | 1.33D/0.17D     | 3.25D/0.24D     | 0.93D/0.12D     |
|                      | Min/Max    | 0.07/3.52D      | 0.01/2.28D      | 2.01/8.22D      | 0.22/3.76D      | 0.04/2.94D      | 1.24/5.19D      | 0.04/2.06D      |
|                      | IQR/CI 95% | 1.41/0.89-1.69D | 0.99/0.61-1.09D | 2.36/4.33-5.55D | 1.95/1.93-2.77D | 1.55/0.99-1.67D | 2.16/2.78-3.72D | 1.05/0.70-1.16D |
| B                    | MAE/STD    | 0.72D/0.14D     | 0.67D/0.12D     | 2.43D/0.32D     | 1.41D/0.18D     | 0.84D/0.11D     | 1.22D/0.17D     | 0.81D/0.11D     |
|                      | Min/Max    | 0.00/2.06D      | 0.07/2.16D      | 0.03/5.08D      | 0.09/2.72D      | 0.00/1.80D      | 0.07/2.64D      | 0.08/1.75D      |
|                      | IQR/CI 95% | 0.75/0.45-0.99D | 0.93/0.43-0.91D | 0.99/1.81-3.05D | 1.33/1.06-1.76D | 0.88/0.62-1.06D | 1.21/0.88-1.56D | 0.68/0.60-1.02D |
| AL/K ≤ 0.67          |            |                 |                 |                 |                 |                 |                 |                 |
| A                    | MAE/STD    | 0.84D/0.14D     | 0.90D/0.16D     | 1.31D/0.13D     | 1.07D/0.15D     | 1.40D/0.20D     | 1.58D/0.20D     | 0.99D/0.16D     |
|                      | Min/Max    | 0.02/4.43D      | 0.00/4.89D      | 0.27/3.22D      | 0.01/4.75D      | 0.03/6.36D      | 0.02/6.62D      | 0.01/4.87D      |
|                      | IQR/CI 95% | 0.99/0.56-1.12D | 0.96/0.59-1.12D | 1.08/1.06-1.56D | 1.08/0.77-1.37D | 1.35/1.00-1.79D | 1.53/1.15-2.01D | 1.19/0.67-1.31D |
| A                    | MAE/STD    | 0.76D/0.11D     | 0.56D/0.12D     | 1.87D/0.35D     | 1.46D/0.18D     | 0.58D/0.14D     | 1.33D/0.19D     | 0.57D/0.14D     |
|                      | Min/Max    | 0.02/1.56D      | 0.02/1.77D      | 0.07/4.28D      | 0.09/2.81D      | 0.02/1.90D      | 0.01/2.91D      | 0.03/1.98D      |
|                      | IQR/CI 95% | 0.94/0.55-0.97D | 0.58/0.33-0.79D | 3.20/1.19-2.55D | 1.29/1.11-1.81D | 0.76/0.30-0.86D | 1.50/0.96-1.70D | 0.79/0.29-0.85D |
| 0.67 < AL/K ≤ 0.75   |            |                 |                 |                 |                 |                 |                 |                 |
| A                    | MAE/STD    | 0.84D/0.10D     | 1.07D/0.11D     | 1.89D/0.17D     | 1.34D/0.12D     | 1.70D/0.16D     | 2.46D/0.18D     | 1.08D/0.12D     |
|                      | Min/Max    | 0.01/2.79D      | 0.05/2.70D      | 0.00/5.42D      | 0.05/3.10D      | 0.01/3.82D      | 0.02/4.37D      | 0.09/2.76D      |
|                      | IQR/CI 95% | 0.93/0.65-1.05D | 1.06/0.85-1.29D | 1.58/1.56-2.22D | 1.30/1.07-1.61D | 1.59/1.39-2.01D | 1.67/2.12-2.80D | 1.39/0.89-1.32D |
| B                    | MAE/STD    | 0.80D/0.12D     | 0.79D/0.11D     | 1.28D/0.20D     | 0.92D/0.14D     | 1.00D/0.13D     | 0.88D/0.14D     | 0.95D/0.13D     |
|                      | Min/Max    | 0.01/2.07D      | 0.02/2.34D      | 0.18/3.86D      | 0.02/2.14D      | 0.14/2.83D      | 0.03/2.47D      | 0.19/2.62D      |
|                      | IQR/CI 95% | 1.07/0.65-1.04D | 0.90/0.57-1.01D | 1.57/0.89-1.67D | 1.09/0.65-1.19D | 1.03/0.73-1.27D | 0.94/0.61-1.15D | 1.04/0.70-2.00D |
| AL/K > 0.75          |            |                 |                 |                 |                 |                 |                 |                 |
| A                    | MAE/STD    | 1.24D/0.12D     | 0.91D/0.10D     | 3.63D/0.26D     | 1.97D/0.16D     | 1.31D/0.13D     | 3.00D/0.18D     | 0.99D/0.09D     |
|                      | Min/Max    | 0.02/3.52D      | 0.01/3.12D      | 0.01/8.22D      | 0.01/4.55D      | 0.04/4.37D      | 0.49/6.06D      | 0.04/3.24D      |
|                      | IQR/CI 95% | 1.25/1.00-1.48D | 1.05/0.72-1.10D | 2.84/3.13-4.13D | 1.92/1.66-2.28D | 1.49/1.06-1.58D | 1.86/2.66-3.36D | 0.97/0.81-1.17D |
| B                    | MAE/STD    | 0.69D/0.09D     | 0.65D/0.08D     | 1.79D/0.20D     | 1.13D/0.12D     | 0.78D/0.09D     | 1.00D/0.11D     | 0.77D/0.08D     |
|                      | Min/Max    | 0.00/2.7D       | 0.07/2.16D      | 0.03/5.08D      | 0.03/2.72D      | 0.00/2.667D     | 0.01/2.64D      | 0.03/2.65D      |
|                      | IQR/CI 95% | 0.58/0.50-0.86D | 0.76/0.50-0.80D | 1.91/1.41-2.17D | 1.09/0.90-1.36D | 0.79/0.61-0.95D | 1.06/0.78-1.22D | 0.74/0.61-0.93D |

G: Group; MedAE; MAE: Mean Absolute Error; STD: Standard Error; Min/Max: Minimum and Maximum Errors; IQR: Interquartile Range; CI 95%: 95% Confidence Interval around the mean.

**Supplementary Table S3.** Multiple comparisons among examined formulas according to Axial Length / Mean Keratometry ratio (AL/K) ranges. (Group A and Group B). Only statistically significant differences were reported.

| Formula        | AL/K $\leq$ 0.67                                                                                                    | 0.67 < AL/K $\leq$ 0.75                                                                                                    | AL/K > 0.75                                                                                                                |
|----------------|---------------------------------------------------------------------------------------------------------------------|----------------------------------------------------------------------------------------------------------------------------|----------------------------------------------------------------------------------------------------------------------------|
| <b>Group A</b> |                                                                                                                     |                                                                                                                            |                                                                                                                            |
| ALMA           | F: p1=0.001/p2=0.01/p3=ns<br>J: p1=ns/p2=0.030/p3=ns<br>K: p1=0.013/p2=0.008/p3=ns<br>L: p1=0.003/p2=0.004/p3=0.001 | F: p1<0.001/p2<0.001/p3<0.001<br>J: p1=ns/p2=ns/p3=0.021<br>K: p1<0.001/p2=0.002/p3<0.001<br>L: p1<0.001/p2<0.001/p3<0.001 | F: p1<0.001/p2=0.004/p3<0.001<br>J: p1=ns/p2=ns/p3=0.010<br>L: p1<0.001/p2=0.004/p3<0.001                                  |
| Barrett        | F: p1=0.003/p2=0.004/p3=ns<br>K: p1=0.028/p2=0.030/p3=ns<br>L: p1=0.006/p2=0.016/p3=0.003                           | F: p1=0.011/p2=0.002/p3=0.003<br>K: p1=0.007/p2=ns/p3=0.007<br>L: p1<0.001/p2=0.006/p3<0.001                               | F: p1<0.001/p2<0.001/p3<0.001<br>J: p1<0.001/p2=0.002/p3<0.001<br>K: p1=ns/p2=ns/p3=0.047<br>L: p1<0.001/p2<0.001/p3<0.001 |
| Kim            | ns                                                                                                                  | ns                                                                                                                         | F: p1<0.001/p2=0.001/p3<0.001<br>J: p1=ns/p2=0.018/p3=0.047<br>L: p1<0.001/p2=0.001/p3<0.001                               |
| Jin            | L: p1=ns/p2=ns/p3=0.031                                                                                             | F: p1=ns/p2=0.006/p3=ns<br>L: p1<0.001/p2=0.013/p3=0.003                                                                   | F: p1=0.019/p2=ns/p3=0.029<br>L: p1=0.002/p2=ns/p3=0.017                                                                   |
| Shammas        | F: p1=ns/p2=0.008/p3=ns<br>L: p1=ns/p2=0.030/p3=0.007                                                               | F: p1=0.013/p2<0.001/p3=0.011<br>K: p1=0.010/p2=0.013/p3=0.021<br>L: p1<0.001/p2<0.001/p3<0.001                            | F: p1<0.001/p2<0.001/p3<0.001<br>J: p1=0.002/p2=0.009/p3=0.001<br>L: p1<0.001/p2<0.001/p3<0.001                            |
| <b>Group B</b> |                                                                                                                     |                                                                                                                            |                                                                                                                            |
| ALMA           | J: p1=0.001/p2=ns/p3=0.030                                                                                          | ns                                                                                                                         | F: p1<0.001/p2<0.001/p3<0.001<br>J: p1=0.028/p2=0.003/p3=0.001<br>L: p1=ns/p2=0.011/p3=0.019                               |
| Barrett        | F: p1=0.044/p2=0.021/p3=0.011<br>J: p1<0.001/p2=0.001/p3=0.001<br>L: p1=0.016/p2=0.008/p3=0.004                     | ns                                                                                                                         | F: p1<0.001/p2<0.001/p3<0.001<br>J: p1=0.012/p2=0.006/p3=0.004<br>L: p1<0.001/p2=0.021/p3=ns                               |
| Kim            | F: p1=ns/p2=0.047/p3=0.011<br>J: p1=0.005/p2=0.003/p3=0.001<br>L: p1=ns/p2=0.021/p3=0.004                           | ns                                                                                                                         | F: p1=0.001/p2=0.001/p3=0.001<br>J: p1=ns/p2=0.038/p3=0.037                                                                |
| Latkany        | ns                                                                                                                  | ns                                                                                                                         | F: p1=ns/p2=ns/p3=0.019                                                                                                    |
| Shammas        | F: p1=ns/p2=0.021/p3=0.011<br>J: p1=0.001/p2=0.001/p3=0.001<br>L: p1=ns/p2=0.008/p3=0.004                           | ns                                                                                                                         | F: p1<0.001/p2=0.001/p3<0.001<br>J: p1=ns/p2=ns/p3=0.009                                                                   |

Formula: best method compared to the formulas shown in the adjacent columns; A: ALMA Formula; B: Barrett True-K Formula; F: Ferrara Formula, K: Kim Formula, J: Jin Formula; L: Latkany Formula; S: Shammas Formula; p1: level of significance regarding median absolute errors between formulas according to the Friedman test with Bonferroni correction; p2/p3: level of significance regarding the percentages of eyes with a refractive Prediction Error within 0.50D and within 1.00D between formulas, according to Cochran Q Test; ns = p value > 0.05.

**Supplementary Table S4.** Multiple comparisons among examined formulas according to different Axial Length (AL) and Mean Keratometry (K) Ranges. (Group A and Group B). Only statistically significant differences were reported.

| Formula | Group A                                                                                                                       |                                                                                                                                | Group B                                                                                                               |                                                                                           |
|---------|-------------------------------------------------------------------------------------------------------------------------------|--------------------------------------------------------------------------------------------------------------------------------|-----------------------------------------------------------------------------------------------------------------------|-------------------------------------------------------------------------------------------|
|         | K ≤ 36.0D                                                                                                                     | AL ≤ 26.5mm                                                                                                                    | K ≤ 36.0D                                                                                                             | AL ≤ 26.5mm                                                                               |
| ALMA    | F: p1=0.002/p2=ns/p3=0.003<br>L: p1<0.001/p2=ns/p3/0.001                                                                      | F: p1=0.003/p2<0.001/p3=ns<br>J: p1=ns/p2=0.026/p3=ns<br>K: p1=ns/p2=0.08/p3=ns<br>L: p1=0.001/p2/0.001/p3/0.004               | F: p1=0.003/p2<0.001/p3=0.002<br>J: p1=ns/p2=0.036/p3=0.028                                                           | F: p1=ns/p2=ns/p3=0.010<br>J: p1<0.001/p2=0.031/p3=0.023                                  |
| Barrett | F: p1<0.001/p2=0.001/p3<0.001<br>J: p1=0.042/p2=0.003/p3=0.013<br>L: p1<0.001/p2=0.001/p3<0.001                               | F: p1=0.006/p2=0.002/p3=ns<br>L: p1=0.003/p2=0.045/p3=ns                                                                       | F: P1<0.001/p2=0.001/p3=0.001<br>J: p1=ns/p2=ns/p3=0.012<br>L: P1=ns/p2=ns/p3=0.028                                   | F: p1=0.008/p2=0.014/p3=0.004<br>J: p1<0.001/p2<0.001/p3=0.010<br>L: p1=0.004/p2=ns/p3=ns |
| Kim     | F: P1<0.001/p2=0.001/p3<0.001<br>J: P1=ns/p2=0.003/p3=0.027<br>L: P1<0.001/p2=0.001/p3=0.001                                  | ns                                                                                                                             | F: P1=0.014/p2=0.003/p3=0.005                                                                                         | F: p1=ns/p2=0.031/p3=0.010<br>J: p1=0.001/p2<0.001/p3=0.023<br>L: p1=ns/p2=0.006/p3=ns    |
| Jin     | L: P1=0.042/p2=ns/p3=0.027                                                                                                    | L: p1=ns/p2=ns/p3=0.008                                                                                                        | ns                                                                                                                    |                                                                                           |
| Shammas | F: P1<0.001/p2=0.023/p3<0.001<br>L: P1<0.001/p2=0.023/p3<0.001                                                                | F: p1=ns/p2=0.002/p3=ns<br>K: p1=ns/p2=0.045/p3=ns<br>L: p1=ns/p2=0.008/p3=0.008                                               | F: P1=0.003/p2=0.007/p3=0.001<br>J: P1=ns/p2=ns/p3=0.012<br>L: P1=ns/p2=ns/p3=0.028                                   | F: p1=ns/p2=0.031/p2=0.010<br>J: p1<0.001/p2<0.001/p3=0.023<br>L: p1=ns/p2=0.006/p3=ns    |
|         | 36.0D < K ≤ 38.0D                                                                                                             | 26.5mm <AL ≤ 28.0mm                                                                                                            | 36.0D < K ≤ 38.0D                                                                                                     | 26.5mm <AL ≤ 28.0mm                                                                       |
| ALMA    | F: P1=0.001/p2=0.003/p3=0.001<br>K: P1=ns/p2=ns/p3=0.049<br>L: P1<0.001/p2=0.003/p3=0.001                                     | F: p1=0.031/p2=0.003/p3<0.001<br>K p1=ns/p2=ns/p3=0.011<br>L: p1<0.001/p2=0.018/p3<0.001                                       | F: P1=ns/p2=ns/p3=0.001                                                                                               | ns                                                                                        |
| Barrett | F: P1<0.001/p2=0.008/p3<0.001<br>J: P1=ns/p2=ns/p3=0.007<br>K: P1=ns/p2=ns/p3=0.003<br>L: P1<0.001/p2=0.008/p3<0.001          | F: p1=0.017/p2=0.003/p3=0.005<br>K: p1=0.045/p2=ns/p3=ns<br>L: p1<0.001/p2=0.018/p3<0.001                                      | F: P1=ns/p2=0.045/p3=0.017                                                                                            | ns                                                                                        |
| Jin     | ns                                                                                                                            | F: p1=ns/p2=0.008/p3=0.022<br>L: p<0.001/p2=0.039/p3=0.002                                                                     | ns                                                                                                                    | ns                                                                                        |
| Kim     | L: P1=0.004/p2=ns/p3=ns                                                                                                       | F: p1=ns/p2=0.039/p3=ns                                                                                                        | F: P1=ns/p2=0ns045/p3=0.046                                                                                           | ns                                                                                        |
| Shammas | F: P1<0.001/p2<0.001/p3<0.001<br>J: P1=ns/p2=ns/p3=0.027<br>K: P1=ns/p2=0.040/p3=0.014<br>L: P1<0.001/p2<0.001/p3<0.001       | F: p1=ns/p2=0.008/p3=0.022<br>L: p1<0.001/p2=0.039/p3=0.002                                                                    | F: P1=ns/p2=0.045/p3=0.046                                                                                            | ns                                                                                        |
|         | 38.0 < K ≤ 40.0D                                                                                                              | 28.0mm <AL ≤ 29.5mm                                                                                                            | 38.0 < K ≤ 40.0D                                                                                                      | 28.0mm <AL ≤ 29.5mm                                                                       |
| ALMA    | F: P1=0.001/p2=0.004/p3=0.001<br>K: P1=0.027/p2=ns/p3=0.021<br>L: P1<0.001/p2=0.004/p3<0.001                                  | F: p1<0.001/p2=0.007/p3<0.001<br>J: p1=0.009/p2=0.042/p3<0.001<br>K: p1=0.041/p2=ns/p3=0.002                                   | F: P1=0.009/p2=ns/p3=ns<br>K: P1=0.043/p2=ns/p3=0ns044<br>J: P1<0.001/p2=0.035/p3=0.001<br>L: P1=0.011/p2=ns/p3=0.016 | F: p1=0.014/p2=0.004/p3=ns                                                                |
| Barrett | F: P1=0.004/p2=0.018/p3=0.005<br>L: P1<0.001/p2=0.018/p3<0.001                                                                | F: p1<0.001/p2=0.007/p3<0.001<br>J: p1=0.007/p2=0.042/p3=0.001<br>K: p1=0.033/p2=ns/p3=0.006<br>L: p1<0.001/p2=0.002/p3<0.001  | J: P1=0.014/p2=ns/p3=0.044                                                                                            | F: p1=ns/p2=0.001/p3=ns                                                                   |
| Kim     | L: p1=ns/p2=ns/p3=0.037                                                                                                       | L: p1=0.006/p2=ns/p3=ns                                                                                                        | ns                                                                                                                    | P1=ns/p2=0.033/p3=ns                                                                      |
| Jin     | F: P1=ns/p2=0.035/p3=ns<br>L: P1<0.001/p2=0.035/p3=0.011                                                                      | L: p1=0.027/p2=ns/p3=ns                                                                                                        | F: P1=ns/p2=ns/p3=0.044                                                                                               | F: p1=ns/p2=0.033/p3=ns                                                                   |
| Shammas | F: p1=0.016/p2=0.008/p3=0.005<br>L: p1=0.001/p2=0.008/p3<0.001                                                                | F: p1<0.001/p2=0.002/p3<0.001/<br>J: p1=0.007/p2=0.017/p3<0.001<br>K: p1=0.033/p2=ns/p3=0.006<br>L: p1<0.001/p2=0.001/p3<0.001 | ns                                                                                                                    | F: p1=ns/p2=0.004/p3=ns                                                                   |
|         | K > 40.0D                                                                                                                     | AL > 29.5mm                                                                                                                    | K > 40.0D                                                                                                             | AL > 29.5mm                                                                               |
| ALMA    | F: p1<0.001/p2<0.001/p3=0.004<br>K: p1<0.001/p2<0.001/p3<0.001<br>J: p1=ns/p2=0.002/p3=0.024<br>L: p1<0.001/p2=0.001/p3<0.001 | F: p1<0.001/p2=0.011/p3<0.001<br>J: p1=ns/p2=0.030/p3=0.021<br>L: p1<0.001/p2=0.011/p3<0.011                                   | ns                                                                                                                    | F: p1=0.013/p2=0.011/p3<0.001<br>J: p1=ns/p2=0.026/p3=0.011                               |
| Barrett | F: p1=0.002/p2=0.001/p3=ns<br>J: p1=ns/p2=0.024/p3=ns<br>K: p1<0.001/p2=0.002/p3=0.010<br>L: p1=0.001/p2=0.011/p3=0.001       | F: p1<0.001/p2=0.004/p3<0.001<br>J: p1=0.011/p2=0.011/p3=0.001<br>L: p1<0.001/p2=0.004/p3<0.001                                | A: p1=ns/p2=0.031/p3=ns<br>F: p1=0.041/p2=0.012/p3<0.001<br>L: p1=ns/p2=ns/p3=0.019<br>J: p1=ns/p2=ns/p3=0.006        | F: p1=0.001/p2=0.026/p3<0.001<br>J: p1=0.017/p2=ns/p3=0.004<br>L: p1=ns/p2=ns/p3=0.026    |
| Jin     | L: p1=ns/p2=ns/p3=0.024                                                                                                       | ns                                                                                                                             | ns                                                                                                                    | ns                                                                                        |
| Kim     | ns                                                                                                                            | F: p1<0.001/p2=0.030/p3=0.001<br>J: p1=ns/p2=ns/p3=0.043<br>L: p1<0.001/p2=0.030/p3=0.001                                      | F: p1=ns/p2=ns/p3=0.006                                                                                               | F: p1=0.035/p2=ns/p3=0.001<br>J: p1=ns/p2=ns/p3=0.026                                     |
| Shammas | F: p1=0.032/p2=0.002/p3=ns<br>J: p1=0.048/p2=ns/p3=ns<br>K: p1=0.004/p2=0.005/p3=0.024<br>L: p1=0.011/p2=0.024/p3=0.004       | F: p1<0.001/p2=0.004/p3<0.001<br>J: p1=0.014/p2=0.011/p3=0.021<br>L: p1<0.001/p2=0.004/p3<0.001                                | A: p1=ns/p2=0.031/p3=ns<br>F: p1=ns/p2=0.012/p3=0.002<br>J: p1=ns/p2=ns/p3=0.019<br>K: p1=ns/p2=0.005/p3=0.024        | F: p1=0.013/p2=ns/p3<0.001<br>J: p1=ns/p2=ns/p3=0.011                                     |

Formula: best method compared to the formulas shown in the adjacent columns; A: ALMA Formula; F: Ferrara Formula; K: Kim Formula; J: Jin Formula; L: Latkany Formula; p1: level of significance regarding median absolute errors between formulas according to the Friedman test with Bonferroni correction; p2/p3: level of significance regarding the percentages of eyes with a refractive Prediction Error within 0.50D and within 1.00D between formulas, according to Cochran Q Test; ns= p value > 0.05.
